# Supplementary material for: The Astrocytic S100B Protein with Its Receptor RAGE Is Aberrantly Expressed in SOD1G93A Models, and Its Inhibition Decreases the Expression of Proinflammatory Genes
Source: Hindawi journal article supplement (doi:10.1155/2017/1626204), 2017-01-01

(A)

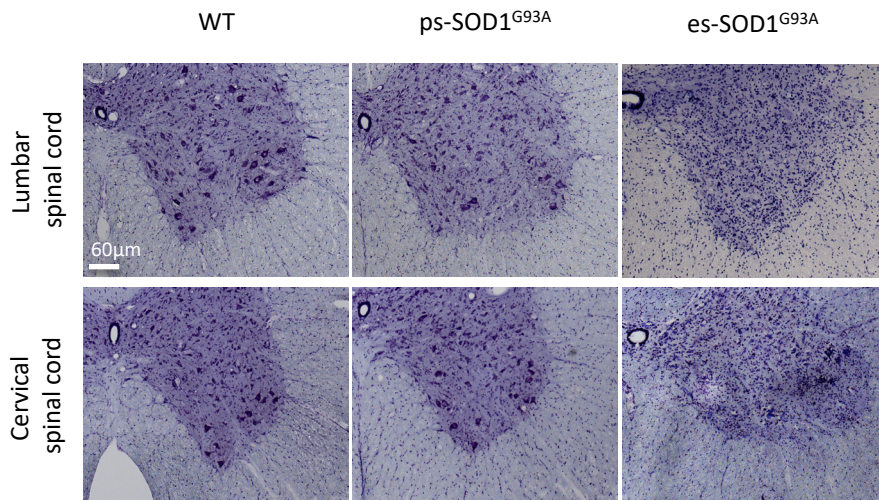

(B)

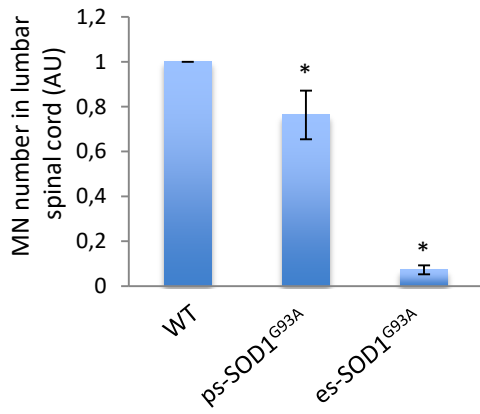

(C)

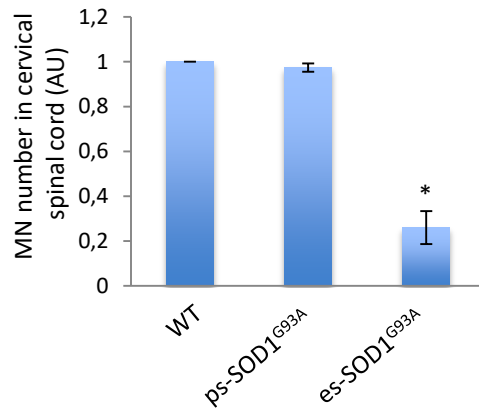

Supplement: f1 [file 1626204.f1.pdf]
