# Supplementary material for: The Astrocytic S100B Protein with Its Receptor RAGE Is Aberrantly Expressed in SOD1G93A Models, and Its Inhibition Decreases the Expression of Proinflammatory Genes
Source: Hindawi journal article supplement (doi:10.1155/2017/1626204), 2017-01-01

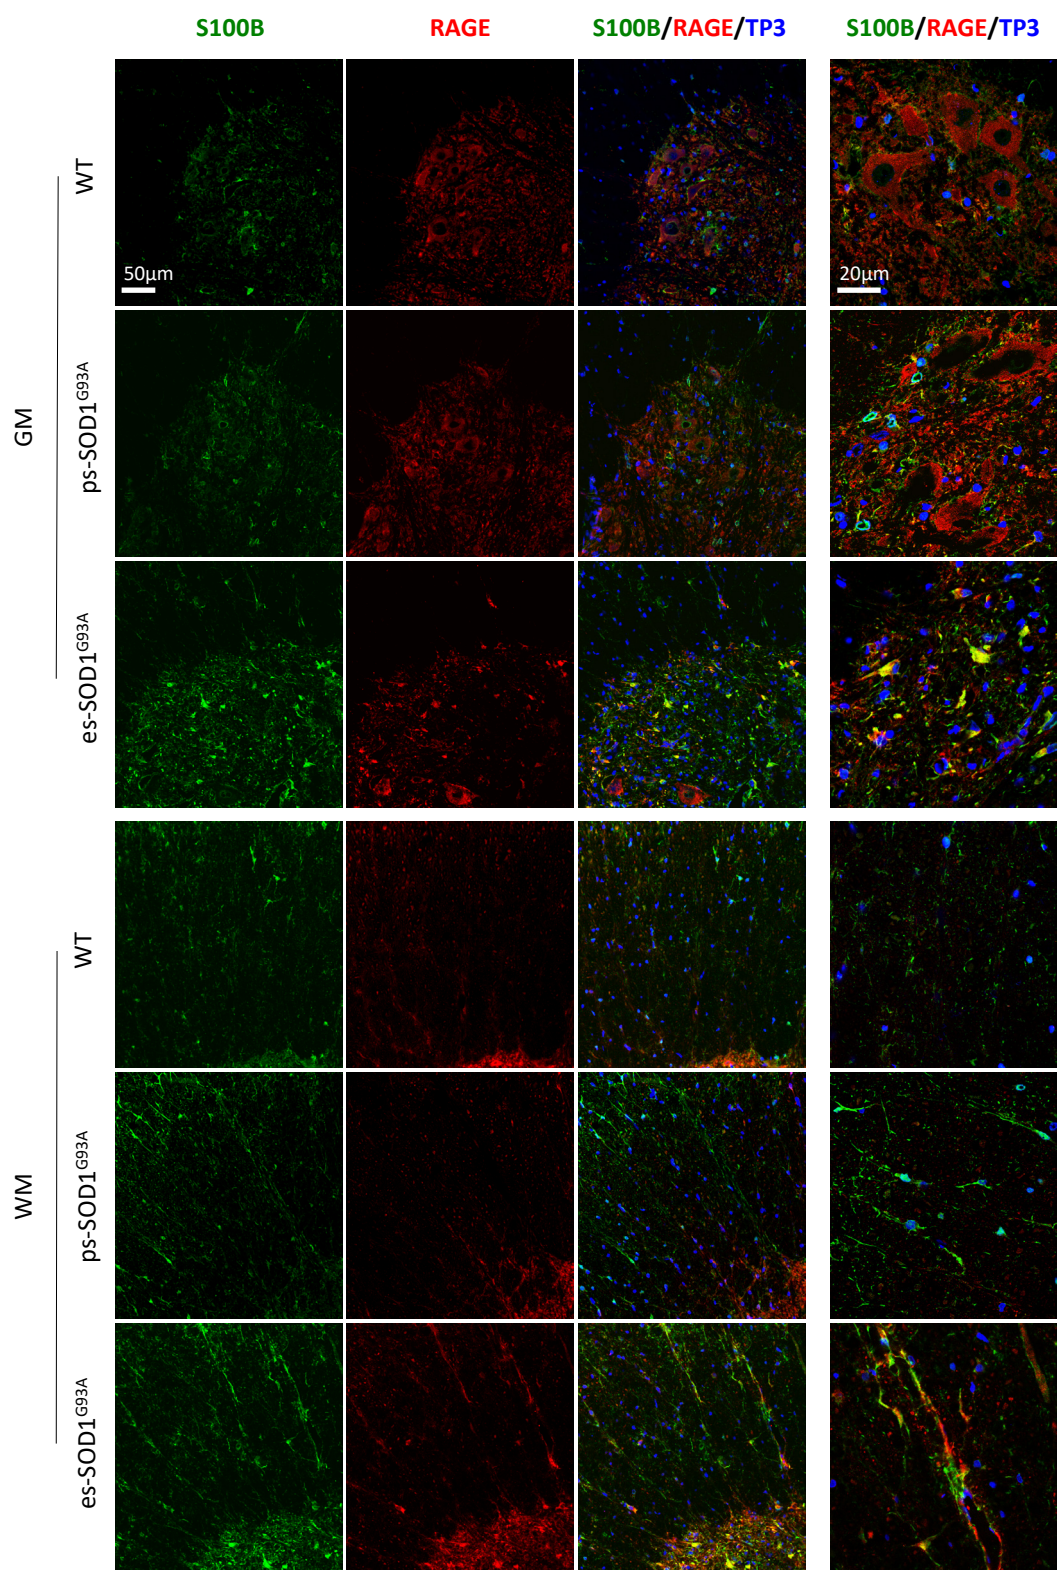

Supplement: f4 [file 1626204.f4.pdf]
